# Supplementary material for: Comparative Study on the Structural Properties and Bioactivities of Three Different Molecular Weights of Lycium barbarum Polysaccharides
Source: MDPI journal article supplement (doi:10.3390/molecules28020701), 2023-01-10
Supplement: s1 [file s1]

**Supplementary Materials for**

**Comparative Study on the Structural Properties  
and Bioactivities of Three Different Molecular  
Weights of *Lycium barbarum* Polysaccharides**

Wenjun Zeng <sup>1,2</sup>, Lulu Chen <sup>1,2</sup>, Zhihui Xiao <sup>3</sup>, Yanping Li <sup>4</sup>, Jianlong Ma <sup>5,6</sup>, Jianbao Ding <sup>4,\*</sup>  
and Jin Yang <sup>1,2,5,\*</sup>

<sup>1</sup> School of Chemistry and Chemical Engineering, North Minzu University, Yinchuan 750021, China

<sup>2</sup> Key Laboratory for Chemical Engineering and Technology, North Minzu University, State Ethnic Affairs Commission, Yinchuan 750021, China

<sup>3</sup> South China Sea Institute of Oceanology, Chinese Academy of Sciences, Guangzhou 510301, China

<sup>4</sup> Ningxia Wuxing Science and Technology Co., Ltd., Yinchuan 750021, China

<sup>5</sup> Ningxia Research Center for Natural Medicine Engineering and Technology, Yinchuan 750021, China

<sup>6</sup> College of Chemistry and Chemical Engineering, Ningxia University, Yinchuan 750021, China

\* Correspondence: nxwxdjb@126.com (J.D.); yang\_jin@nwnu.edu.cn (J.Y.); Tel.: +86-951-6048881 (J.D.); +86-951-2067917 (J.Y.)

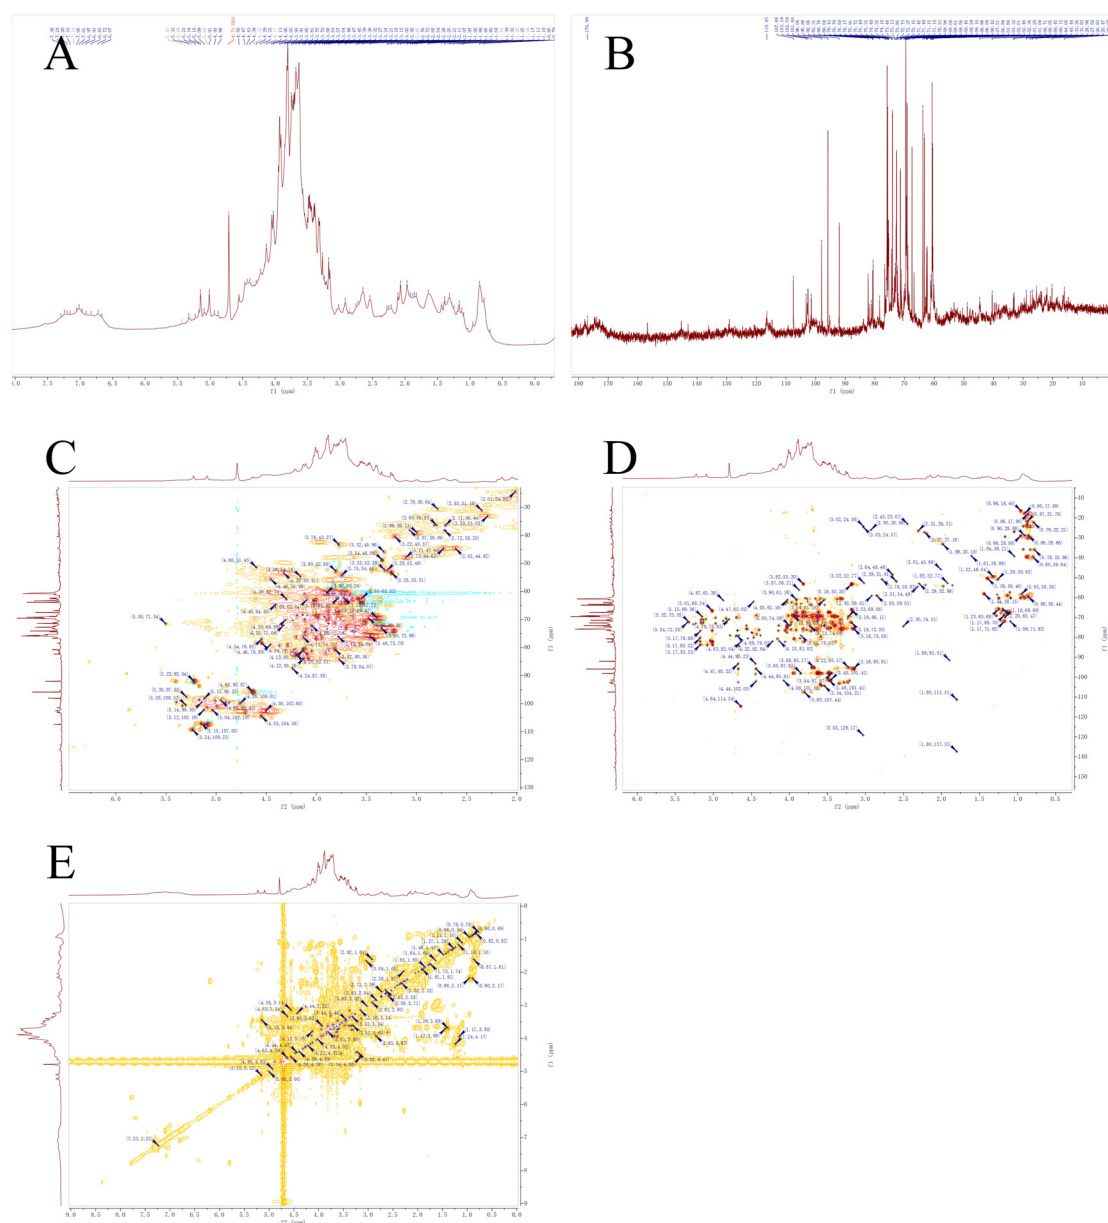

**Figure S1.** NMR spectra of LBPs-2:  $^1\text{H}$  NMR spectra (D<sub>2</sub>O, 700 MHz) (A);  $^{13}\text{C}$  NMR spectra (D<sub>2</sub>O, 175 MHz) (B); HSQC spectra (C); HMBC spectra (D);  $^1\text{H}$ - $^1\text{H}$  COSY spectra (E).

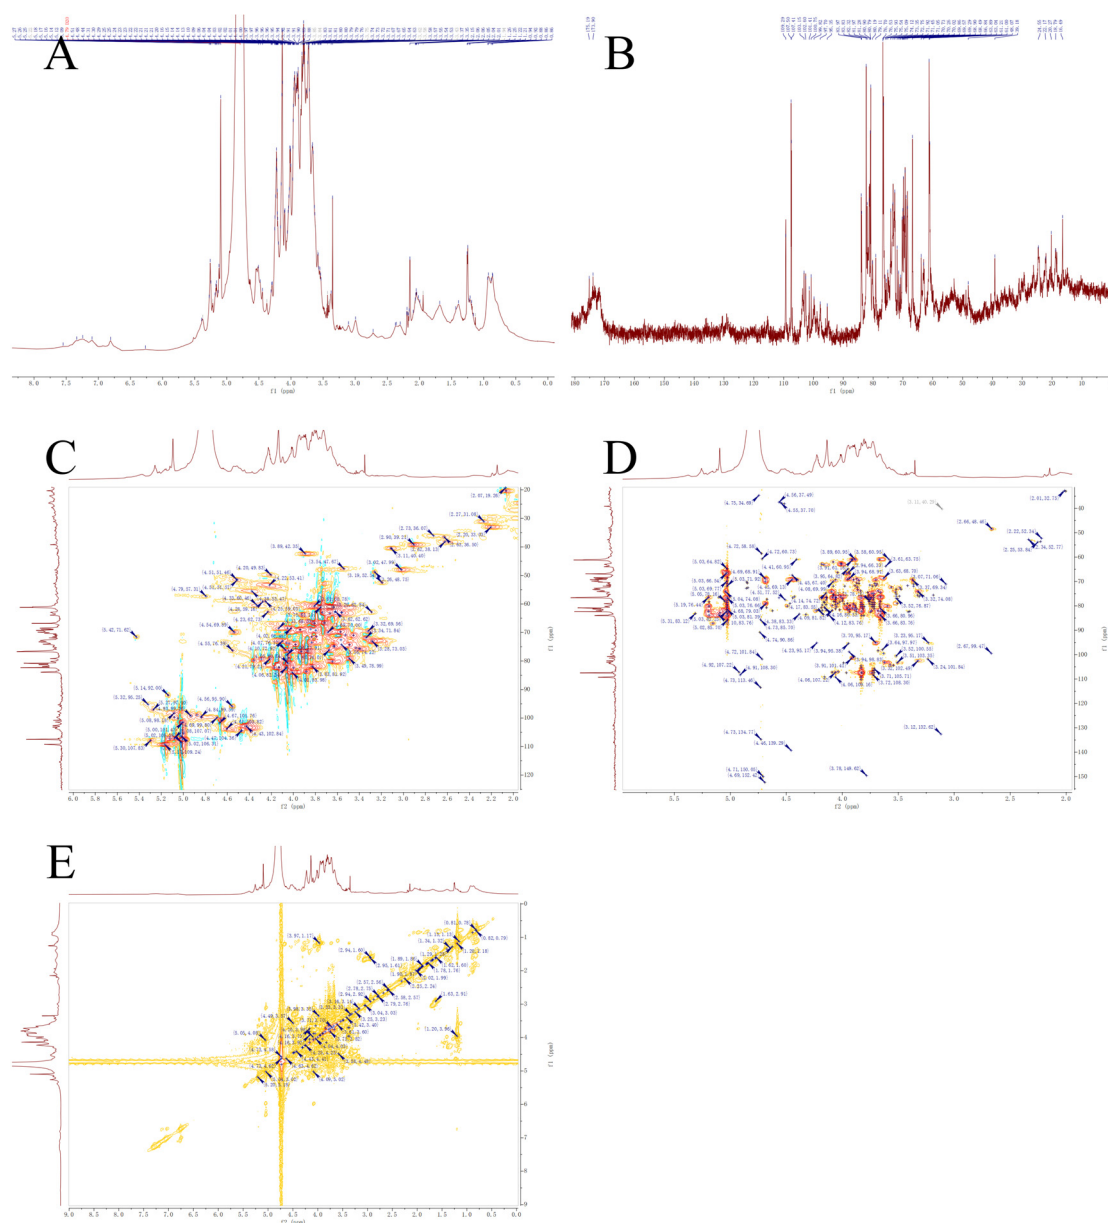

**Figure S2.** NMR spectra of LBPs-3:  $^1\text{H}$  NMR spectra (D<sub>2</sub>O, 700 MHz) (A);  $^{13}\text{C}$  NMR spectra (D<sub>2</sub>O, 175 MHz) (B); HSQC spectra (C); HMBC spectra (D);  $^1\text{H}$ - $^1\text{H}$  COSY spectra (E).
